# Supplementary material for: Sensitive and accurate DNA metabarcoding of parasitic helminth mock communities using the mitochondrial rRNA genes
Source: PubMed Central journal article supplement (PMC9200835; doi:10.1038/s41598-022-14176-z), 2022-06-15
Supplement: 41598_2022_14176_MOESM1_ESM.pdf [file 41598_2022_14176_MOESM1_ESM.pdf]

**Sensitive and accurate DNA metabarcoding of parasitic helminth mock communities using the mitochondrial rRNA genes**

Abigail Hui En Chan<sup>1</sup>, Naowarat Saralamba<sup>2</sup>, Sompob Saralamba<sup>3</sup>, Jiraporn Ruangsittichai<sup>4</sup>, Kittipong Chaisiri<sup>1</sup>, Yanin Limpanont<sup>5</sup>, Vachirapong Charoennitiwat<sup>1</sup>, Urusa Thaenkham<sup>1\*</sup>

<sup>1</sup>Department of Helminthology, Faculty of Tropical Medicine, Mahidol University, Bangkok, Thailand

<sup>2</sup>Department of Molecular Tropical Medicine and Genetics, Mahidol University, Bangkok, Thailand

<sup>3</sup>Mathematical and Economic Modelling (MAEMOD), Mahidol Oxford Tropical Medicine Research Unit, Faculty of Tropical Medicine, Mahidol University, Bangkok, Thailand

<sup>4</sup>Department of Medical Entomology, Faculty of Tropical Medicine, Mahidol University, Bangkok, Thailand

<sup>5</sup>Department of Social and Environmental Medicine, Faculty of Tropical Medicine, Mahidol University, Thailand

\*Corresponding author

**Supplementary Table S1. The number of raw sequence reads and final sequences obtained after NGS quality filtering, and percentage of target specific sequences obtained per mock helminth community**

| Genetic marker and helminth group | Mock helminth community | Number of total sequence reads | Number of raw merged raw sequence reads that passed quality filtering | Number of sequences obtained after amplicon size filtering | % of target specific sequences |
|-----------------------------------|-------------------------|--------------------------------|-----------------------------------------------------------------------|------------------------------------------------------------|--------------------------------|
| 12S-platyhelminth                 | Neat (replicate 1)      | 99,700                         | 45,974                                                                | 102                                                        | 100.00                         |
|                                   | Neat (replicate 2)      | 100,556                        | 46,304                                                                | 107                                                        | 100.00                         |
|                                   | Neat (replicate 3)      | 96,052                         | 44,244                                                                | 103                                                        | 100.00                         |
|                                   | Human fecal Tissue      | 90,790                         | 40,719                                                                | 38                                                         | 100.00                         |
|                                   |                         | 83,166                         | 34,012                                                                | 25                                                         | 100.00                         |
|                                   | Pond water              | 95,470                         | 43,140                                                                | 33                                                         | 100.00                         |
| 12S-nematode                      | Neat (replicate 1)      | 123,882                        | 43,309                                                                | 165                                                        | 4.24                           |
|                                   | Neat (replicate 2)      | 123,438                        | 44,275                                                                | 144                                                        | 6.25                           |
|                                   | Neat (replicate 3)      | 128,556                        | 44,471                                                                | 152                                                        | 5.92                           |
|                                   | Human fecal             | 183,272                        | 20,883                                                                | 193                                                        | 2.07                           |
|                                   | Garden soil             | 109,614                        | 26,489                                                                | 160                                                        | 10.62                          |
|                                   | Tissue                  | 121,906                        | 46,564                                                                | 40                                                         | 82.5                           |
|                                   | Pond water              | 182,254                        | 28,633                                                                | 138                                                        | 0.72                           |
| 16S-helminth                      | Neat (replicate 1)      | 131,396                        | 41,720                                                                | 302                                                        | 96.36                          |
|                                   |                         |                                | <b>21,324</b>                                                         | <b>64</b>                                                  | <b>67.19</b>                   |
|                                   | Neat (replicate 2)      | 111,314                        | 35,772                                                                | 219                                                        | 94.52                          |
|                                   |                         |                                | <b>17,788</b>                                                         | <b>66</b>                                                  | <b>95.45</b>                   |
|                                   | Neat (replicate 3)      | 118,034                        | 36,708                                                                | 258                                                        | 95.74                          |
|                                   |                         |                                | <b>19,729</b>                                                         | <b>56</b>                                                  | <b>94.64</b>                   |
|                                   | Human fecal             | 139,288                        | 47,012                                                                | 146                                                        | 99.31                          |
|                                   |                         |                                | <b>7,938</b>                                                          | <b>49</b>                                                  | <b>51.02</b>                   |
| 16S-helminth                      | Garden soil             | 118,878                        | NA                                                                    | NA                                                         | NA                             |
|                                   |                         |                                | <b>52,259</b>                                                         | <b>75</b>                                                  | <b>100.00</b>                  |
|                                   | Tissue                  | 161,124                        | 17,045                                                                | 52                                                         | 55.77                          |
|                                   |                         |                                | <b>48,840</b>                                                         | <b>156</b>                                                 | <b>100.00</b>                  |
| 16S-helminth                      | Pond water              | 121,282                        | 57,767                                                                | 146                                                        | 100.00                         |
|                                   |                         |                                | <b>221</b>                                                            | <b>15</b>                                                  | <b>0</b>                       |

The values in **bold** text for 16S-helminth indicate the data obtained for nematodes while those not in bold text indicate the data obtained for platyhelminths.

**Supplementary Table S2. Mitochondrial 12S and 16S rRNA gene sequences used in analysis**

| <b>Helminth group</b> | <b>Species</b>                                        | <b>NCBI ascension number</b>                           |                                                                                                                                                       |
|-----------------------|-------------------------------------------------------|--------------------------------------------------------|-------------------------------------------------------------------------------------------------------------------------------------------------------|
| Platyhelminth         | <i>Opisthorchis viverrini</i>                         | <b>JF739555</b>                                        |                                                                                                                                                       |
|                       |                                                       | MZ331639/ <u>MZ331603</u><br>MZ331640/ <u>MZ331604</u> |                                                                                                                                                       |
|                       | <i>Opisthorchis lobatus</i>                           | MZ331637/ <u>MZ331601</u><br>MZ331638/ <u>MZ331602</u> |                                                                                                                                                       |
|                       |                                                       | <i>Clonorchis sinensis</i>                             | <b>MT607652</b><br><b>KY564177</b><br><b>FJ381664</b><br><b>JF729304</b><br><b>JF729303</b><br>MZ331635/ <u>MZ331595</u><br>MZ331636/ <u>MZ331596</u> |
|                       | <i>Haplorchis taichui</i>                             |                                                        | <b>KF214770</b><br><b>MG972809</b><br>MZ331646/ <u>MZ331605</u>                                                                                       |
|                       |                                                       |                                                        | <i>Paragonimus pseudoheterotremus</i>                                                                                                                 |
|                       | <i>Paragonimus heterotremus</i>                       |                                                        |                                                                                                                                                       |
|                       |                                                       |                                                        | <i>Clinostomum complanatum</i><br><i>Clinostomum</i> sp.                                                                                              |
|                       |                                                       | <i>Fasciola gigantica</i>                              |                                                                                                                                                       |
|                       | <i>Eurytrema pancreaticum</i><br><i>Eurytrema</i> sp. |                                                        | <b>KP241855</b><br>MZ331671/ <u>MZ345704</u><br>MZ331672/ <u>MZ345705</u><br>MZ331673/ <u>MZ331634</u>                                                |
|                       |                                                       |                                                        | <i>Schistosoma mekongi</i>                                                                                                                            |
|                       |                                                       | <i>Taenia solium</i>                                   |                                                                                                                                                       |
|                       |                                                       | <i>Taenia saginata</i>                                 | <b>AY684274</b>                                                                                                                                       |
|                       |                                                       | <i>Bothridium pithonis</i>                             | <b>MW602526</b>                                                                                                                                       |
|                       | Nematode                                              | <i>Trichuris trichiura</i>                             | <b>GU385218</b><br><b>KT449826</b><br><b>MW448472</b>                                                                                                 |

|                                    |                           |
|------------------------------------|---------------------------|
|                                    | <b>MW448470</b>           |
|                                    | <b>KY368774</b>           |
|                                    | <b>KY368773</b>           |
|                                    | <b>KY368772</b>           |
|                                    | <b>KY368771</b>           |
|                                    | <b>KY368770</b>           |
|                                    | <b>KY368769</b>           |
|                                    | <b>KY368768</b>           |
|                                    | <b>KY368766</b>           |
|                                    | <b>KY368765</b>           |
|                                    | MT135051/ <u>MT151872</u> |
|                                    | MT135052/ <u>MT151873</u> |
| <i>Trichinella spiralis</i>        | <b>GU386314</b>           |
|                                    | <b>AF293969</b>           |
|                                    | <b>KM357422</b>           |
|                                    | MT135055/ <u>MT151876</u> |
|                                    | MT135056/ <u>MT151877</u> |
| <i>Trichinella papuae</i>          | <b>KM357417</b>           |
|                                    | MT135053/ <u>MT151874</u> |
|                                    | MT135054/ <u>MT151875</u> |
| <i>Capillaria sp.</i>              | <b>MH665363</b>           |
| <i>Ascaris lumbricoides</i>        | <b>HQ704900</b>           |
|                                    | <b>JN801161</b>           |
|                                    | <b>MT135063</b>           |
|                                    | <b>MT135064</b>           |
| <i>Gnathostoma spinigerum</i>      | <b>KP410547</b>           |
|                                    | MT135071/ <u>MT151890</u> |
|                                    | MT135072/ <u>MT151891</u> |
| <i>Strongyloides stercoralis</i>   | <b>LC050212</b>           |
|                                    | <b>MT135075</b>           |
|                                    | <b>MT135076</b>           |
| <i>Haemonchus contortus</i>        | <b>EU346694</b>           |
|                                    | MT135077/ <u>MT151894</u> |
|                                    | MT135078/ <u>MT151895</u> |
| <i>Angiostrongylus cantonensis</i> | <b>MK570629</b>           |
|                                    | <b>GQ398121</b>           |
|                                    | <b>KT186242</b>           |
|                                    | <b>MK570632</b>           |
|                                    | <b>MK570631</b>           |
|                                    | <b>MK570630</b>           |
|                                    | MT135082/ <u>MT151899</u> |
|                                    | MT135083/ <u>MT151900</u> |
| <i>Globocephalus sp.</i>           | MT135092/ <u>MT151909</u> |
|                                    | MT135093/ <u>MT151910</u> |
| <i>Oesophagostomum dentatum</i>    | <b>GQ888716</b>           |
|                                    | MT135084/ <u>MT151901</u> |

---

|                           |                           |
|---------------------------|---------------------------|
|                           | MT135085/ <u>MT151902</u> |
| <i>Necator americanus</i> | <b>AJ417719</b>           |
|                           | MT135090/ <u>MT151907</u> |
|                           | MT135091/ <u>MT151908</u> |

---

Ascension numbers in **bold** were obtained from complete mitochondrial genomes, while those in normal text are the partial 12S rRNA gene sequences and those underlined are the partial 16S rRNA gene sequences.
